# Supplementary material
Source: Research Square preprint supplement (doi:10.21203/rs.3.rs-9239134/v1)
Supplement: Supplementary file 1 [file 23abfe51161836391fa73ac3.docx]

| **Sample** | **Mean [Bq/m3]** | **S.D. [Bq/m3]** | **High [Bq/m3]** | **Low [Bq/m3]** |
| --- | --- | --- | --- | --- |
| Groundwater 1 | 1090 | 192 | 1230 | 820 |
| Groundwater 2 | 171 | 172 | 410 | 0 |
| Groundwater 3 | 238 | 281 | 544 | 0 |
| Stream Inflow 1 | 34 | 68 | 136 | 0 |
| River 0 | 68.1 | 78.7 | 137 | 0 |
| River 1 | 34.2 | 68.3 | 137 | 0 |
| River 1A | 102 | 68.2 | 137 | 0 |
| River 1A | 34.2 | 68.3 | 137 | 0 |
| River 2 | 0 | 0 | 0 | 0 |
| River 2A | 0 | 0 | 0 | 0 |
| River 3 | 34 | 68 | 136 | 0 |
| River 4 | 34.2 | 68.3 | 137 | 0 |
| River 5 | 34 | 68 | 136 | 0 |
| River 6 | 68.1 | 78.7 | 137 | 0 |
| River 6A | 68.3 | 78.9 | 137 | 0 |
| River 7 | 34.2 | 68.3 | 137 | 0 |
| Stream Inflow 2 | 102 | 131 | 273 | 0 |
| River 8 | 102 | 68.2 | 137 | 0 |
| River 9 | 68.3 | 78.9 | 137 | 0 |
| River 10 | 103 | 131 | 273 | 0 |
| River 10A | 103 | 131 | 273 | 0 |

Supplementary Table 1: Radon Measurement Data, each point consists of 4 measurement cycles
